# Supplementary material for: Effect of Evening Primrose Oil Supplementation on Selected Parameters of Skin Condition in a Group of Patients Treated with Isotretinoin—A Randomized Double-Blind Trial
Source: MDPI journal article supplement (doi:10.3390/nu14142980), 2022-07-21
Supplement: s1 [file s1]

**Table S1. CONSORT 2010 checklist of information to include when reporting a randomised trial\***

| Section/Topic                                        | Item No | Checklist item                                                                                                                                                                              | Reported on page No                                           |
|------------------------------------------------------|---------|---------------------------------------------------------------------------------------------------------------------------------------------------------------------------------------------|---------------------------------------------------------------|
| <b>Title and abstract</b>                            |         |                                                                                                                                                                                             |                                                               |
|                                                      | 1a      | Identification as a randomised trial in the title                                                                                                                                           | 1                                                             |
|                                                      | 1b      | Structured summary of trial design, methods, results, and conclusions                                                                                                                       | 1                                                             |
| <b>Introduction</b>                                  |         |                                                                                                                                                                                             |                                                               |
| Background and objectives                            | 2a      | Scientific background and explanation of rationale                                                                                                                                          | 1-2                                                           |
|                                                      | 2b      | Specific objectives or hypotheses                                                                                                                                                           | 3                                                             |
| <b>Methods</b>                                       |         |                                                                                                                                                                                             |                                                               |
| Trial design                                         | 3a      | Description of trial design (such as parallel, factorial) including allocation ratio                                                                                                        | 4-5                                                           |
|                                                      | 3b      | Important changes to methods after trial commencement (such as eligibility criteria), with reasons                                                                                          | -                                                             |
| Participants                                         | 4a      | Eligibility criteria for participants                                                                                                                                                       | 3                                                             |
|                                                      | 4b      | Settings and locations where the data were collected                                                                                                                                        | 5                                                             |
| Interventions                                        | 5       | The interventions for each group with sufficient details to allow replication, including how and when they were actually administered                                                       | 4-5                                                           |
| Outcomes                                             | 6a      | Completely defined pre-specified primary and secondary outcome measures, including how and when they were assessed                                                                          | 4-7                                                           |
|                                                      | 6b      | Any changes to trial outcomes after the trial commenced, with reasons                                                                                                                       | -                                                             |
| Sample size                                          | 7a      | How sample size was determined                                                                                                                                                              | 5                                                             |
|                                                      | 7b      | When applicable, explanation of any interim analyses and stopping guidelines                                                                                                                | 3-5                                                           |
| Randomisation:                                       |         |                                                                                                                                                                                             |                                                               |
| Sequence generation                                  | 8a      | Method used to generate the random allocation sequence                                                                                                                                      | 5                                                             |
|                                                      | 8b      | Type of randomisation; details of any restriction (such as blocking and block size)                                                                                                         | 4-5                                                           |
| Allocation concealment mechanism                     | 9       | Mechanism used to implement the random allocation sequence (such as sequentially numbered containers), describing any steps taken to conceal the sequence until interventions were assigned | 4                                                             |
| Implementation                                       | 10      | Who generated the random allocation sequence, who enrolled participants, and who assigned participants to interventions                                                                     | 3, 5                                                          |
| Blinding                                             | 11a     | If done, who was blinded after assignment to interventions (for example, participants, care providers, those assessing outcomes) and how                                                    | 5                                                             |
|                                                      | 11b     | If relevant, description of the similarity of interventions                                                                                                                                 | -                                                             |
| Statistical methods                                  | 12a     | Statistical methods used to compare groups for primary and secondary outcomes                                                                                                               | 6-7                                                           |
|                                                      | 12b     | Methods for additional analyses, such as subgroup analyses and adjusted analyses                                                                                                            | -                                                             |
| <b>Results</b>                                       |         |                                                                                                                                                                                             |                                                               |
| Participant flow (a diagram is strongly recommended) | 13a     | For each group, the numbers of participants who were randomly assigned, received intended treatment, and were analysed for the primary outcome                                              | 7                                                             |
|                                                      | 13b     | For each group, losses and exclusions after randomisation, together with reasons                                                                                                            | 7                                                             |
| Recruitment                                          | 14a     | Dates defining the periods of recruitment and follow-up                                                                                                                                     | 7                                                             |
|                                                      | 14b     | Why the trial ended or was stopped                                                                                                                                                          | -                                                             |
| Baseline data                                        | 15      | A table showing baseline demographic and clinical characteristics for each group                                                                                                            | 7                                                             |
| Numbers analysed                                     | 16      | For each group, number of participants (denominator) included in each analysis and whether the analysis was by original assigned groups                                                     | 7                                                             |
| Outcomes and estimation                              | 17a     | For each primary and secondary outcome, results for each group, and the estimated effect size and its precision (such as 95% confidence interval)                                           | 7-10 (results are presented as median and quartile deviation) |
|                                                      | 17b     | For binary outcomes, presentation of both absolute and relative effect sizes is recommended                                                                                                 | -                                                             |
| Ancillary analyses                                   | 18      | Results of any other analyses performed, including subgroup analyses and adjusted analyses, distinguishing pre-specified from exploratory                                                   | -                                                             |

| Section/Topic            | Item No | Checklist item                                                                                                   | Reported on page No                    |
|--------------------------|---------|------------------------------------------------------------------------------------------------------------------|----------------------------------------|
| Harms                    | 19      | All important harms or unintended effects in each group (for specific guidance see CONSORT for harms [42])       | -                                      |
| <b>Discussion</b>        |         |                                                                                                                  |                                        |
| Limitations              | 20      | Trial limitations, addressing sources of potential bias, imprecision, and, if relevant, multiplicity of analyses | 11-13                                  |
| Generalisability         | 21      | Generalisability (external validity, applicability) of the trial findings                                        | 11-13                                  |
| Interpretation           | 22      | Interpretation consistent with results, balancing benefits and harms, and considering other relevant evidence    | 11-13                                  |
| <b>Other information</b> |         |                                                                                                                  |                                        |
| Registration             | 23      | Registration number and name of trial registry                                                                   | The study was not registered           |
| Protocol                 | 24      | Where the full trial protocol can be accessed, if available                                                      | Authors of the work                    |
| Funding                  | 25      | Sources of funding and other support (such as supply of drugs), role of funders                                  | There were no funders or other support |
